# Supplementary figures and images for: Zinc Oxide Nanoparticles Biosynthesized by Eriobotrya japonica Leaf Extract: Characterization, Insecticidal and Antibacterial Properties
Source: MDPI journal article supplement (doi:10.3390/plants12152826), 2023-07-31

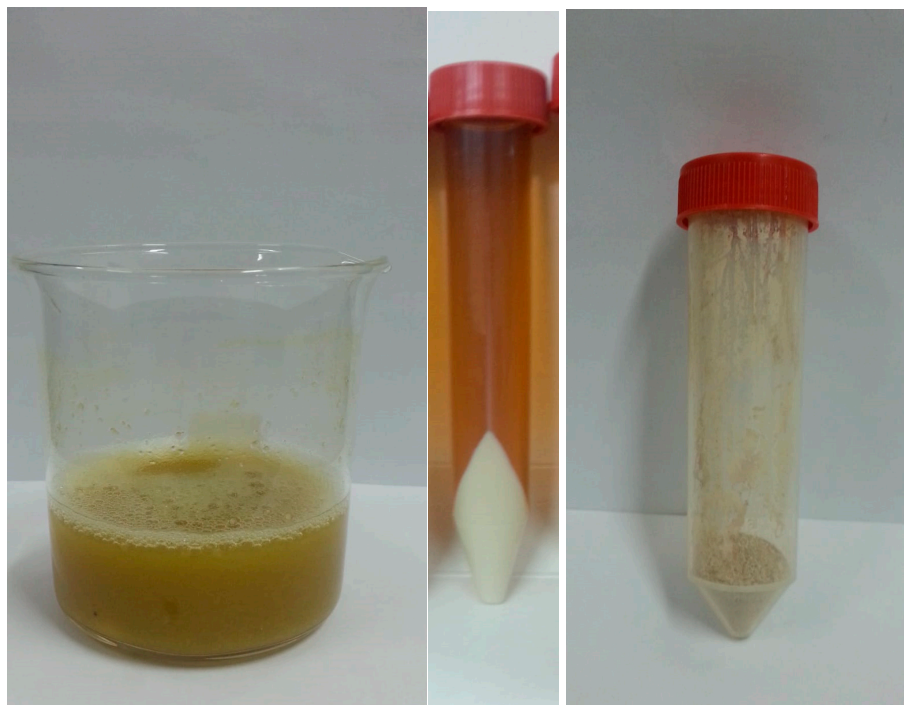

**Figure S1.** Synthesis of ZnO nanoparticles by *Eriobotrya japonica* leaves extract.

Supplement: s1 [file s1]
